# Supplementary material
Source: ML conference proceedings conference paper supplement (https://www.ecva.net/papers/eccv_2024/papers_ECCV/html/2662_ECCV_2024_paper.php)
Supplement: Supplementary file 1 [file 02662-supp.pdf]

# MVSGaussian: Fast Generalizable Gaussian Splatting Reconstruction from Multi-View Stereo

Tianqi Liu<sup>1</sup>, Guangcong Wang<sup>2,3</sup>, Shoukang Hu<sup>2</sup>, Liao Shen<sup>1</sup>,  
Xinyi Ye<sup>1</sup>, Yuhang Zang<sup>4</sup>, Zhiguo Cao<sup>1\*</sup>, Wei Li<sup>2†</sup>, and Ziwei Liu<sup>2</sup>

<sup>1</sup> School of AIA, Huazhong University of Science and Technology

<sup>2</sup> S-Lab, Nanyang Technological University

<sup>3</sup> Great Bay University

<sup>4</sup> Shanghai AI Laboratory

{tq\_liu,zgcao}@hust.edu.cn

<https://mvsgaussian.github.io/>

## 1 Implementation and Network Details

**Implementation Details.** Following ENeRF [8], we partition the DTU [1] dataset into 88 training scenes and 16 test scenes. We train the generalizable model on four RTX 3090 GPUs using the Adam [6] optimizer, with an initial learning rate set to  $5e - 4$ . The learning rate is halved every 50k iterations. During the training process, we select 2, 3, and 4 source views as inputs with respective probabilities of 0.1, 0.8, and 0.1. For evaluation, we follow the criteria established in prior works such as ENeRF [8] and MVSNerF [3]. Specifically, for the DTU test set, segmentation masks are employed to evaluate performance, defined based on the availability of ground-truth depth at each pixel. For Real Forward-facing dataset [10], where the marginal region of images is typically invisible to input images, we evaluate the 80% area in the center of the images. This evaluation methodology is also applied to the Tanks and Temples dataset [7]. The image resolutions of the DTU, the Real Forward-facing, the NeRF Synthetic [11], and the Tanks and Temples datasets are  $512 \times 640$ ,  $640 \times 960$ ,  $800 \times 800$ , and  $640 \times 960$  respectively. As discussed in Sec. 4.3 of the main text, we employ a consistency check to filter out noisy points for high-quality initialization. Specifically, we apply a dynamic consistency checking algorithm [9, 15], the details of which are provided in Algorithm 1. The predefined thresholds  $\{\theta_p(n)\}_{n=1}^{N_\theta}$  are set to  $\{\frac{n}{8}\}_{n=1}^{N_\theta}$ , and  $\{\theta_d(n)\}_{n=1}^{N_\theta}$  are set to  $\{\frac{n}{10}\}_{n=1}^{N_\theta}$ . For 3D-GS [5], following [20], we use COLMAP [12] to reconstruct the point cloud from the working set (training views) as initialization. Specifically, we employ COLMAP’s automatic reconstruction to achieve the reconstruction of sparse point clouds. Some examples are shown in Fig. 1. As mentioned in Sec.5.1 of the main text, our optimization strategy and hyperparameters settings remain consistent with the vanilla 3D-GS, except for the number of iterations. The iterations of our method on Real

---

\* Corresponding author

† Project lead

---

**Algorithm 1:** Dynamic Consistency Checking

---

**Input:** Camera parameters, Depth maps  $D_0$  and  $\{D_i\}_{i=1}^N$ , predefined thresholds  $\{\theta_p(n)\}_{n=1}^{N_\theta}$  and  $\{\theta_d(n)\}_{n=1}^{N_\theta}$

**Output:**  $Mask$

- 1 **Initialization:**  $Mask \leftarrow 0$
- 2 **for**  $i$  **in**  $(1, \dots, N)$  **do**
- 3      $Err_p^i \leftarrow zeros(H, W), Err_d^i \leftarrow zeros(H, W)$
- 4     **for**  $p$  **in**  $(0, 0)$  **to**  $(H - 1, W - 1)$  **do**
- 5          $\xi_p^i \leftarrow \|p - p'\|_2$ , ▷ calculate the reprojection error between  $D_0$  and  $D_i$
- 6          $\xi_d^i \leftarrow \|D_0(p) - d'\|_1 / D_0(p)$
- 7          $Err_p^i(p) \leftarrow \xi_p^i$
- 8          $Err_d^i(p) \leftarrow \xi_d^i$
- 9     **end**
- 10    **for**  $n$  **in**  $(1, \dots, N_\theta)$  **do**
- 11         $Mask_n^i \leftarrow (Err_p^i < \theta_p(n)) \& (Err_d^i < \theta_d(n))$
- 12    **end**
- 13 **end**
- 14 **for**  $n$  **in**  $(1, \dots, N_\theta)$  **do**
- 15      $Mask_n \leftarrow 0$
- 16     **for**  $i$  **in**  $(1, \dots, N)$  **do**
- 17         $Mask_n \leftarrow Mask_n + Mask_n^i$
- 18     **end**
- 19      $Mask_n \leftarrow (Mask_n > n)$
- 20      $Mask \leftarrow Mask \cup Mask_n$
- 21 **end**

---

Forward-facing, NeRF Synthetic and Tanks and Temples datasets are 2.5k, 5k and 5k, respectively.

**Network Details.** As mentioned in Sec. 4.2 of the main text, we apply a pooling network  $\rho$  to aggregate multi-view features to obtain the aggregated features via  $f_v = \rho(\{f_i\}_{i=1}^N)$ . The implementation details are consistent with [8]: initially, the mean  $\mu$  and variance  $v$  of  $\{f_i\}_{i=1}^N$  are computed. Subsequently,  $\mu$  and  $v$  are concatenated with each  $f_i$  and an MLP is applied to generate weights. The  $f_v$  is then blended using a soft-argmax operator, combining the obtained weights and multi-view features ( $\{f_i\}_{i=1}^N$ ).

## 2 Additional Ablation Experiments

**Numbers of Views.** Existing generalizable Gaussian methods, such as PixelSplat [2] and GPS-Gaussian [19], focus on image pairs as input, while Splatter Image [13] prioritize single-view reconstruction. Our method is view-agnostic, capable of supporting varying numbers of views as input. We report the performance with varying numbers of input views in Table 1. As the number of views increases, the model can leverage more scene information, leading to improved

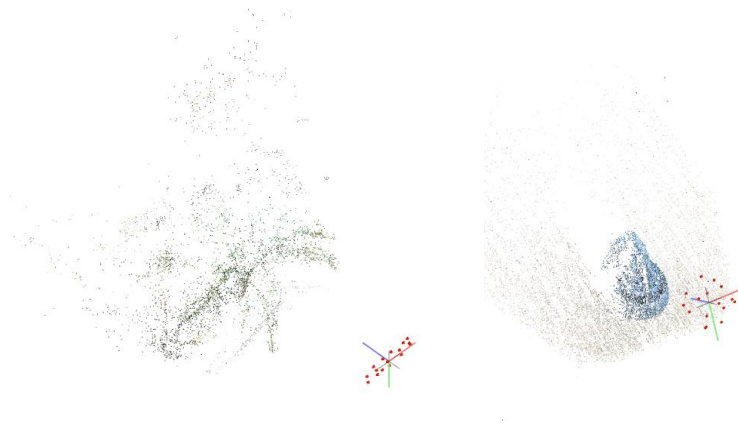

Fig. 1: Visualization of camera calibration and point cloud reconstruction by COLMAP.

Table 1: The performance of our method with varying numbers of input views on the DTU, Real Forward-facing, and NeRF Synthetic datasets. “Mem” and “FPS” are measured under the image resolution of  $512 \times 640$ .

| Views | DTU [1] |        |         | Real Forward-facing [10] |        |         | NeRF Synthetic [11] |        |         | Mem(GB)↓ | FPS↑ |
|-------|---------|--------|---------|--------------------------|--------|---------|---------------------|--------|---------|----------|------|
|       | PSNR ↑  | SSIM ↑ | LPIPS ↓ | PSNR ↑                   | SSIM ↑ | LPIPS ↓ | PSNR ↑              | SSIM ↑ | LPIPS ↓ |          |      |
| 2     | 25.78   | 0.947  | 0.095   | 23.11                    | 0.834  | 0.175   | 25.06               | 0.937  | 0.079   | 0.866    | 24.5 |
| 3     | 28.21   | 0.963  | 0.076   | 24.07                    | 0.857  | 0.164   | 26.46               | 0.948  | 0.071   | 0.876    | 21.5 |
| 4     | 28.43   | 0.965  | 0.075   | 24.46                    | 0.870  | 0.164   | 26.50               | 0.949  | 0.071   | 1.106    | 19.1 |

performance. Meanwhile, increasing the number of views only introduces a slight increase in computational cost and memory consumption.

**Numbers of Sampled Points.** In the main text, we apply a pixel-align Gaussian representation, where each pixel is unprojected into 3D space based on the estimated depth, corresponding to a 3D Gaussian. An alternative approach is to sample  $M$  depths centered at the estimated depth map, resulting in each pixel being unprojected into  $M$  Gaussians. As shown in Table 2, increasing the number of 3D sampled points improves performance but raises computational costs. To strike a balance between cost and performance, we set  $M = 1$ .

**Density for Volume Rendering.** Since only one point per ray is sampled, our model predicts single radiance  $r$  and density  $\sigma$ . In this case, the pixel’s color  $c$  obtained through volume rendering is given by  $c = (1 - \exp(-\sigma))r$ . This resembles pixel-aligned splatting, where one Gaussian contributes one pixel, sharing the alpha-based rendering principles but offering a simpler implementation. Therefore, predicting density is necessary as it indicates the point’s opacity, as validated by ablation results in Table 3.

**Initialization Comparison.** Our generalization model can provide a denser point cloud for 3D-GS [5] than Structure-from-Motion (SfM) as initialization.

**Table 2: The performance of different numbers of sampled points on the DTU, Real Forward-facing, NeRF Synthetic, and Tanks and Temples datasets.** Here, "Samples" represents the number of 3D points sampled along the ray for each pixel.

| Samples | DTU [1] |        |         | Real Forward-facing [10] |        |         | NeRF Synthetic [11] |        |         | Tanks and Temples [7] |        |         | Mem(GB)↓ | FPS↑ |
|---------|---------|--------|---------|--------------------------|--------|---------|---------------------|--------|---------|-----------------------|--------|---------|----------|------|
|         | PSNR ↑  | SSIM ↑ | LPIPS ↓ | PSNR ↑                   | SSIM ↑ | LPIPS ↓ | PSNR ↑              | SSIM ↑ | LPIPS ↓ | PSNR ↑                | SSIM ↑ | LPIPS ↓ |          |      |
| 1       | 28.21   | 0.963  | 0.076   | 24.07                    | 0.857  | 0.164   | 26.46               | 0.948  | 0.071   | 23.28                 | 0.877  | 0.139   | 0.876    | 21.5 |
| 2       | 28.26   | 0.963  | 0.075   | 24.20                    | 0.861  | 0.163   | 26.64               | 0.949  | 0.070   | 23.20                 | 0.879  | 0.151   | 1.508    | 19.0 |

**Table 3: The ablation study on the density prediction.**

| Settings    | DTU   |       |       | Real Forward-facing |       |       | NeRF Synthetic |       |       |
|-------------|-------|-------|-------|---------------------|-------|-------|----------------|-------|-------|
|             | PSNR  | SSIM  | LPIPS | PSNR                | SSIM  | LPIPS | PSNR           | SSIM  | LPIPS |
| w/o density | 28.03 | 0.963 | 0.076 | 23.96               | 0.854 | 0.165 | 26.22          | 0.947 | 0.071 |
| w density   | 28.21 | 0.963 | 0.076 | 24.07               | 0.857 | 0.164 | 26.46          | 0.948 | 0.071 |

Considering that the MVS method can also obtain a denser point cloud, we conduct the comparison in Table 4. MVS methods are typically trained on DTU [1] and BlendedMVS [17], then tested on Tanks and Temples dataset [7]. Thus, we select the latest ET-MVSNet [9] and compare it on Tanks and Temples dataset. While ET-MVSNet [9] surpasses SfM, it’s still limited. Because it focuses solely on accurate depth, while our method generates point clouds tailored for view synthesis. Depth and view quality aren’t directly proportional, as mentioned in previous works such as ENeRF [8].

**Depth Analysis.** Benefiting from the explicit geometry reasoning of MVS, our method can produce reasonable depth maps, as illustrated in Fig. 2. The quantitative results are shown in Table 5. Compared with previous generalizable NeRF methods, our method can achieve the most accurate depth estimation.

**Point Cloud Analysis.** As discussed in Sec. 5.4 of the main text, different point cloud aggregation strategies can provide varying-quality initialization for subsequent per-scene optimization. Here, we report the initial and final numbers of point clouds in Table 6 and provide the visual comparison in Fig. 4. The direct concatenation approach leads to excessively large initialization point clouds, which slow down optimization and rendering speeds. The down-sampling approach can reduce the total number of points and mitigate noisy points, but it also leads to a reduction in effective points. Our applied consistency check strategy can filter out noisy points while retaining effective ones.

**Inference Speed Analysis.** As shown in Table 1 of the main text, the inference speed (FPS) of our generalizable model is 21.5. Here, we present the inference time breakdown result in Table 7. The primary time overhead comes from the neural network, while the subsequent rendering process incurs minimal time overhead. Therefore, we discard the neural network component during the per-scene optimization stage, resulting in a significant increase in speed.

**Table 4: Initialization Comparison.**

| Initialization | PSNR  | SSIM  | LPIPS | Time <sub>ft</sub> | FPS  |
|----------------|-------|-------|-------|--------------------|------|
| ET-MVSNet [9]  | 22.66 | 0.861 | 0.204 | 90s                | 300+ |
| Ours           | 24.58 | 0.903 | 0.137 | 90s                | 300+ |

**Table 5: Quantitative comparison of depth reconstruction on the DTU test set.** MVSNet is trained using depth supervision, while other methods are trained with only RGB image supervision. “Abs err” refers to the average absolute error, and “Acc(X)” denotes the percentage of pixels with an error less than X mm.

| Method         | Reference view |              |              | Novel view  |              |              |
|----------------|----------------|--------------|--------------|-------------|--------------|--------------|
|                | Abs err ↓      | Acc(2)↑      | Acc(10)↑     | Abs err ↓   | Acc(2)↑      | Acc(10)↑     |
| MVSNet [16]    | 3.60           | 0.603        | 0.955        | -           | -            | -            |
| PixelNeRF [18] | 49             | 0.037        | 0.176        | 47.8        | 0.039        | 0.187        |
| IBRNet [14]    | 338            | 0.000        | 0.913        | 324         | 0.000        | 0.866        |
| MVSNeRF [3]    | 4.60           | 0.746        | 0.913        | 7.00        | 0.717        | 0.866        |
| ENeRF-MVS [8]  | 3.80           | 0.823        | 0.937        | 4.80        | 0.778        | 0.915        |
| ENeRF-NeRF [8] | 3.80           | 0.837        | 0.939        | 4.60        | 0.792        | 0.917        |
| Ours           | <b>3.11</b>    | <b>0.866</b> | <b>0.956</b> | <b>3.66</b> | <b>0.838</b> | <b>0.945</b> |

### 3 More Qualitative Results

**Qualitative Results under the Generalization Setting.** As shown in Fig. 3, we present qualitative comparisons of the generalization results obtained by different methods. Our method is capable of producing higher-fidelity views, particularly in some challenging areas. For instance, in geometrically complex scenes, around objects’ edges, and in reflective areas, our method can reconstruct more details while exhibiting fewer artifacts.

**Qualitative Results under the Per-scene Optimization Setting.** As shown in Fig. 5, we present the visual comparison after fine-tuning. Benefiting from the strong initialization provided by our generalizable model, excellent performance can be achieved with just a short fine-tuning period. The views synthesized by our method preserve more scene details and exhibit fewer artifacts.

**Table 6: Comparison of point cloud quantities under different aggregation strategies on the Real Forward-facing dataset.** For downsampling, we employ widely-used voxel downsampling, with a voxel size set to 2. The iteration number for all strategies is set to 2.5k.

| Strategy             | initial points(k) | final points(k) |
|----------------------|-------------------|-----------------|
| direct concatenation | 2458              | 2176            |
| downsampling         | 836               | 839             |
| consistency check    | 860               | 913             |

**Table 7: Time overhead for each module (in milliseconds).**

| Modules                 | coarse stage | fine stage |
|-------------------------|--------------|------------|
| Feature extractor       | 1.3          |            |
| Depth estimation        | 8.1          | 7.9        |
| Gaussian representation | -            | 24.0       |
| Gaussian rendering      | -            | 4.4        |

## 4 Per-scene Breakdown

As shown in Tables 8, 11, 10, and 9, we present the per-scene breakdown results of DTU [1], NeRF Synthetic [11], Real Forward-facing [10], and Tanks and Temples [7] datasets. These results align with the averaged results presented in the main text.

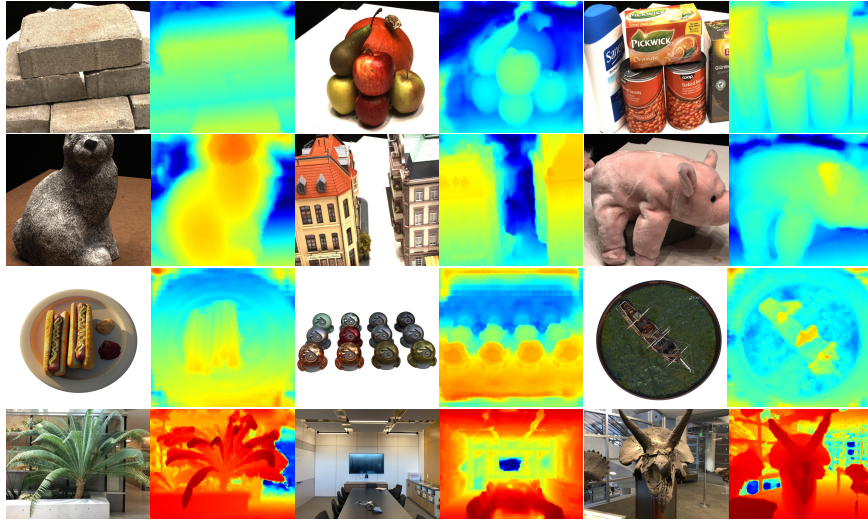

**Fig. 2: Depth maps visualization.** We visualize the depth maps predicted by our method on different datasets [1, 10, 11].

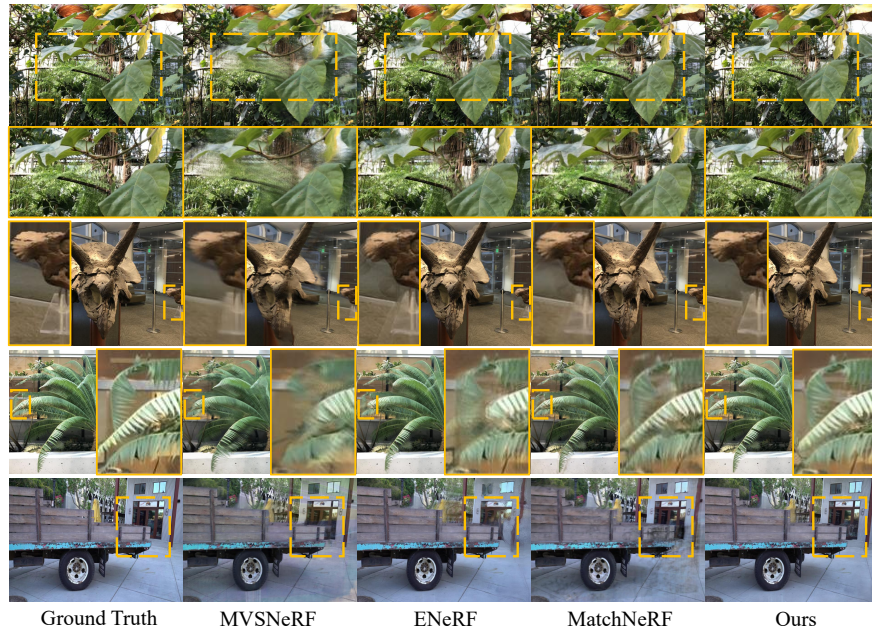

**Fig. 3: Qualitative comparison of rendering quality with state-of-the-art methods [3, 4, 8] under generalization and three views settings.**

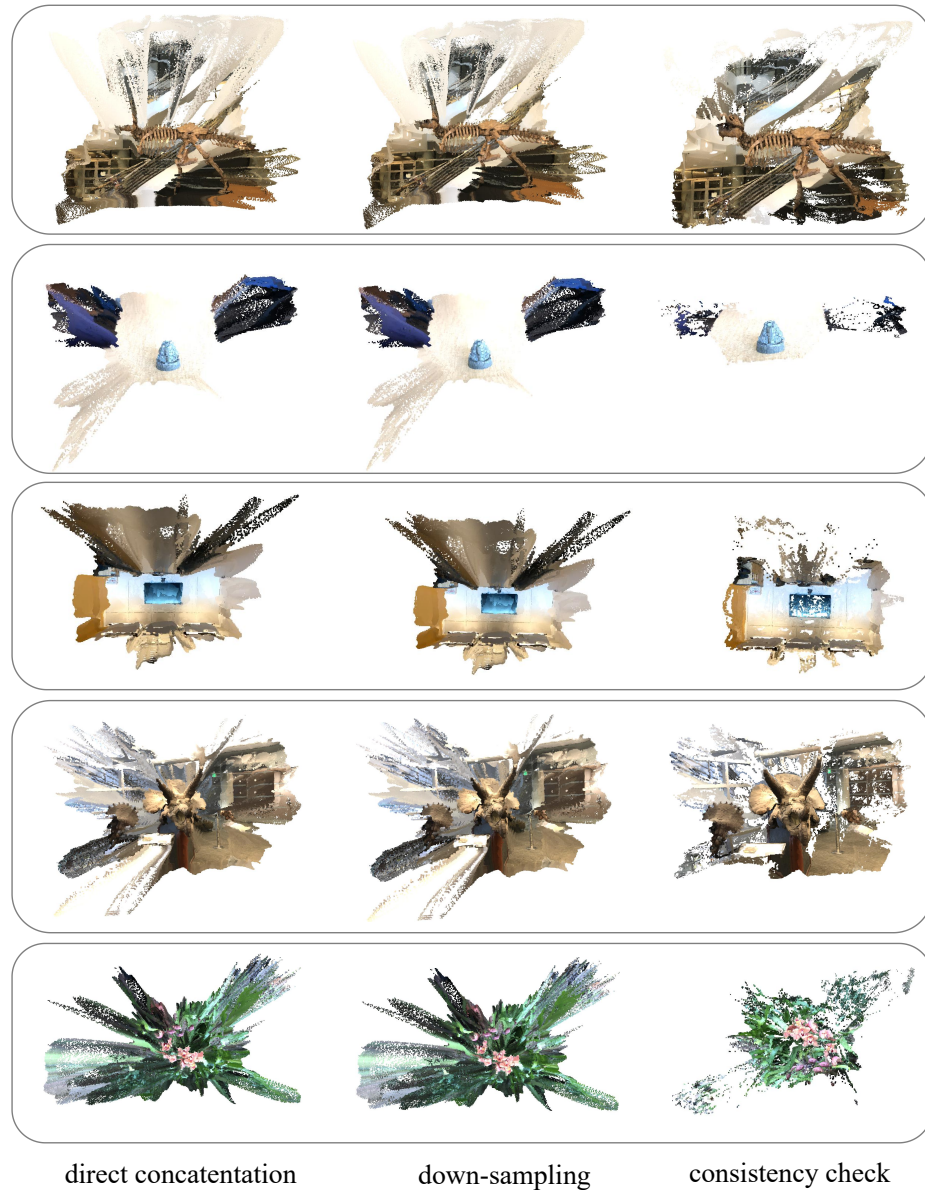

Fig. 4: Point cloud visualization under different aggregation strategies.



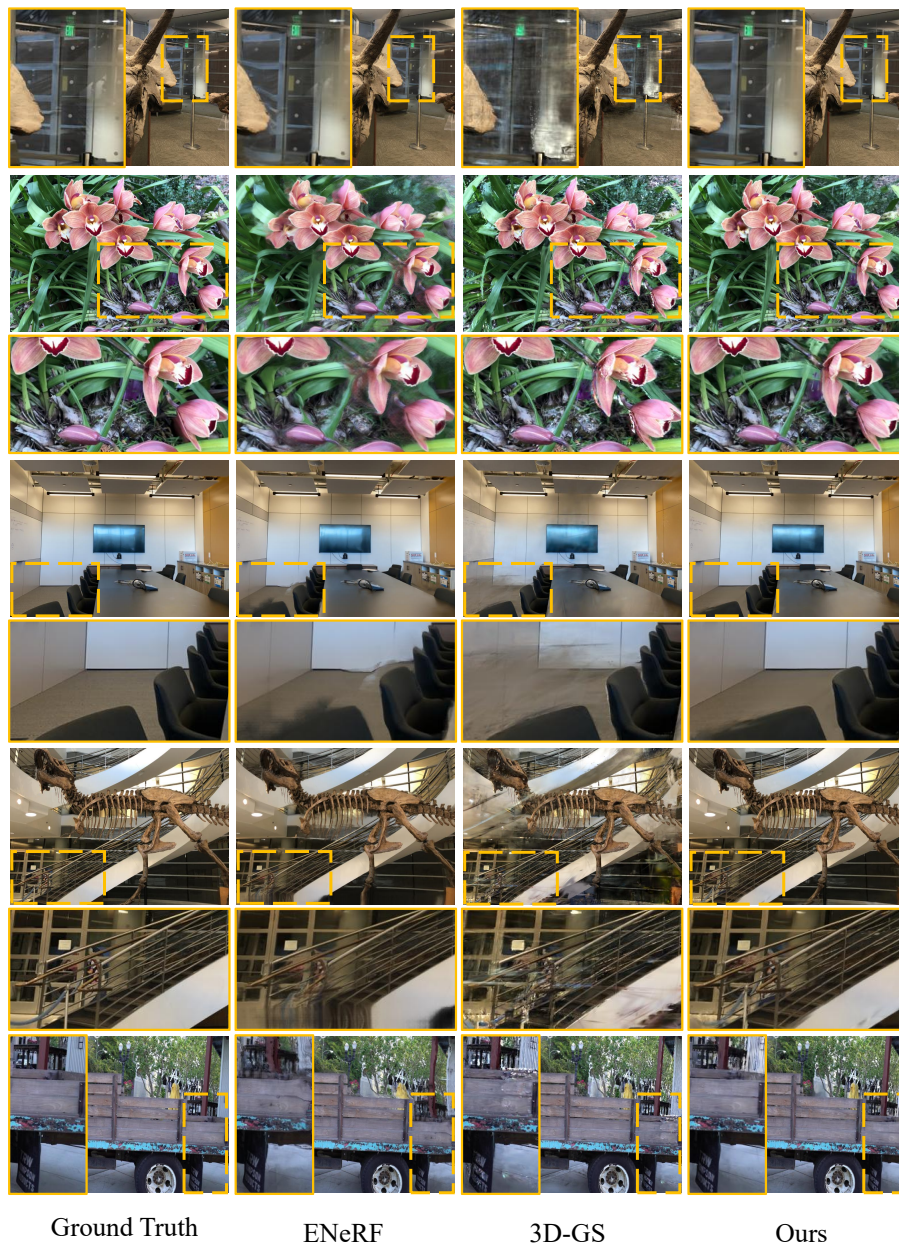

Fig. 5: Qualitative comparison of rendering quality with state-of-the-art methods [5, 8] after per-scene optimization.

**Table 8: Quantitative per-scene breakdown results on the DTU test set.** PixelSplat\* and Ours\* represent the results obtained with a 2-view input, while the others are the results obtained with a 3-view input.

| Scan            | #1                 | #8           | #21          | #103         | #114         | #30          | #31          | #34          | #38          | #40          | #41          | #45          | #55          | #63          | #82          | #110         |
|-----------------|--------------------|--------------|--------------|--------------|--------------|--------------|--------------|--------------|--------------|--------------|--------------|--------------|--------------|--------------|--------------|--------------|
| Metric          | PSNR $\uparrow$    |              |              |              |              |              |              |              |              |              |              |              |              |              |              |              |
| PixelNeRF [18]  | 21.64              | 23.70        | 16.04        | 16.76        | 18.40        | -            | -            | -            | -            | -            | -            | -            | -            | -            | -            | -            |
| IBRNet [14]     | 25.97              | 27.45        | 20.94        | 27.91        | 27.91        | -            | -            | -            | -            | -            | -            | -            | -            | -            | -            | -            |
| MVSNeRF [3]     | 26.96              | 27.43        | 21.55        | 29.25        | 27.99        | -            | -            | -            | -            | -            | -            | -            | -            | -            | -            | -            |
| ENeRF [8]       | <u>28.85</u>       | <u>29.05</u> | 22.53        | <u>30.51</u> | <u>28.86</u> | <u>29.20</u> | <u>25.13</u> | <u>26.77</u> | <u>28.61</u> | <u>25.67</u> | <u>29.51</u> | <b>24.83</b> | <u>30.26</u> | <u>27.22</u> | 26.83        | <u>27.97</u> |
| MatchNeRF [4]   | 27.69              | 27.76        | <u>22.75</u> | 29.35        | 28.16        | 29.16        | 24.26        | 25.66        | 27.52        | 25.16        | 28.27        | 23.94        | 26.64        | <b>29.40</b> | <u>27.65</u> | 27.15        |
| Ours            | <b>29.67</b>       | <b>29.65</b> | <b>23.24</b> | <b>30.60</b> | <b>29.26</b> | <b>30.10</b> | <b>25.94</b> | <b>26.82</b> | <b>29.27</b> | <b>26.13</b> | <b>30.33</b> | <u>24.55</u> | <b>31.40</b> | <u>28.46</u> | <b>27.82</b> | <b>28.15</b> |
| PixelSplat* [2] | 14.65              | 14.72        | 10.69        | 16.88        | 15.31        | 10.93        | 13.28        | 14.70        | 14.81        | 13.26        | 16.09        | 12.62        | 15.76        | 12.18        | 12.11        | 16.18        |
| Ours*           | 27.22              | 26.88        | 20.49        | 28.25        | 27.89        | 27.55        | 22.96        | 25.32        | 27.13        | 22.89        | 27.71        | 21.78        | 28.85        | 27.01        | 24.64        | 25.92        |
| Metric          | SSIM $\uparrow$    |              |              |              |              |              |              |              |              |              |              |              |              |              |              |              |
| PixelNeRF [18]  | 0.827              | 0.829        | 0.691        | 0.836        | 0.763        | -            | -            | -            | -            | -            | -            | -            | -            | -            | -            | -            |
| IBRNet [14]     | 0.918              | 0.903        | 0.873        | 0.950        | 0.943        | -            | -            | -            | -            | -            | -            | -            | -            | -            | -            | -            |
| MVSNeRF [3]     | 0.937              | 0.922        | 0.890        | 0.962        | 0.949        | -            | -            | -            | -            | -            | -            | -            | -            | -            | -            | -            |
| ENeRF [8]       | <u>0.958</u>       | <u>0.955</u> | <u>0.916</u> | <u>0.968</u> | <u>0.961</u> | <u>0.981</u> | <u>0.937</u> | <u>0.934</u> | <u>0.946</u> | <u>0.947</u> | <u>0.960</u> | <u>0.948</u> | <u>0.973</u> | <u>0.978</u> | <u>0.971</u> | <u>0.974</u> |
| MatchNeRF [4]   | 0.936              | 0.918        | 0.901        | 0.961        | 0.948        | 0.974        | 0.921        | 0.874        | 0.902        | 0.903        | 0.936        | 0.934        | 0.929        | 0.976        | 0.966        | 0.962        |
| Ours            | <b>0.966</b>       | <b>0.961</b> | <b>0.930</b> | <b>0.970</b> | <b>0.963</b> | <b>0.983</b> | <b>0.946</b> | <b>0.947</b> | <b>0.954</b> | <b>0.957</b> | <b>0.967</b> | <b>0.954</b> | <b>0.979</b> | <b>0.980</b> | <b>0.974</b> | <b>0.976</b> |
| PixelSplat* [2] | 0.690              | 0.706        | 0.492        | 0.778        | 0.651        | 0.782        | 0.624        | 0.534        | 0.513        | 0.571        | 0.714        | 0.541        | 0.624        | 0.807        | 0.769        | 0.802        |
| Ours*           | 0.950              | 0.948        | 0.895        | 0.963        | 0.954        | 0.977        | 0.919        | 0.925        | 0.933        | 0.928        | 0.951        | 0.933        | 0.967        | 0.974        | 0.965        | 0.966        |
| Metric          | LPIPS $\downarrow$ |              |              |              |              |              |              |              |              |              |              |              |              |              |              |              |
| PixelNeRF [18]  | 0.373              | 0.384        | 0.407        | 0.376        | 0.372        | -            | -            | -            | -            | -            | -            | -            | -            | -            | -            | -            |
| IBRNet [14]     | 0.190              | 0.252        | 0.179        | 0.195        | 0.136        | -            | -            | -            | -            | -            | -            | -            | -            | -            | -            | -            |
| MVSNeRF [3]     | 0.155              | 0.220        | 0.166        | 0.165        | 0.135        | -            | -            | -            | -            | -            | -            | -            | -            | -            | -            | -            |
| ENeRF [8]       | <u>0.086</u>       | <u>0.119</u> | <u>0.107</u> | <u>0.107</u> | <u>0.076</u> | <u>0.052</u> | <u>0.108</u> | <u>0.117</u> | <u>0.118</u> | <u>0.120</u> | <u>0.091</u> | <u>0.077</u> | <u>0.069</u> | <u>0.048</u> | <u>0.066</u> | <u>0.069</u> |
| MatchNeRF [4]   | 0.157              | 0.227        | 0.149        | 0.179        | 0.132        | 0.085        | 0.169        | 0.234        | 0.220        | 0.216        | 0.174        | 0.127        | 0.164        | 0.077        | 0.093        | 0.141        |
| Ours            | <b>0.069</b>       | <b>0.102</b> | <b>0.088</b> | <b>0.098</b> | <b>0.070</b> | <b>0.048</b> | <b>0.093</b> | <b>0.097</b> | <b>0.098</b> | <b>0.101</b> | <b>0.075</b> | <b>0.067</b> | <b>0.055</b> | <b>0.041</b> | <b>0.057</b> | <b>0.057</b> |
| PixelSplat* [2] | 0.423              | 0.366        | 0.471        | 0.357        | 0.366        | 0.329        | 0.429        | 0.435        | 0.493        | 0.427        | 0.438        | 0.488        | 0.343        | 0.278        | 0.326        | 0.254        |
| Ours*           | 0.087              | 0.118        | 0.121        | 0.114        | 0.079        | 0.057        | 0.126        | 0.118        | 0.126        | 0.132        | 0.093        | 0.090        | 0.074        | 0.049        | 0.067        | 0.079        |

**Table 9: Quantitative per-scene breakdown results on the Tanks and Temples dataset.** PixelSplat\* and Ours\* represent the results obtained with a 2-view input and low-resolution images, while the other generalizable results are obtained with a 3-view input.

| Scene                           | Train           |                 |                    | Truck           |                 |                    |
|---------------------------------|-----------------|-----------------|--------------------|-----------------|-----------------|--------------------|
|                                 | PSNR $\uparrow$ | SSIM $\uparrow$ | LPIPS $\downarrow$ | PSNR $\uparrow$ | SSIM $\uparrow$ | LPIPS $\downarrow$ |
| IBRNet [14]                     | 22.35           | 0.763           | 0.285              | 19.13           | 0.755           | 0.280              |
| MVSNeRF [3]                     | 20.58           | 0.816           | 0.278              | 21.16           | 0.830           | 0.242              |
| ENeRF [8]                       | <u>22.54</u>    | <u>0.851</u>    | <u>0.204</u>       | <u>22.53</u>    | <u>0.856</u>    | <u>0.163</u>       |
| MatchNeRF [4]                   | 20.44           | 0.789           | 0.332              | 21.16           | 0.796           | 0.269              |
| Ours                            | <b>23.00</b>    | <b>0.872</b>    | <b>0.154</b>       | <b>23.55</b>    | <b>0.883</b>    | <b>0.124</b>       |
| PixelSplat* [2]                 | 18.21           | 0.638           | 0.252              | 20.58           | 0.741           | 0.195              |
| Ours*                           | 23.67           | 0.864           | 0.132              | 22.68           | 0.834           | 0.127              |
| NeRF [11]                       | 21.02           | 0.707           | 0.538              | 21.82           | 0.696           | 0.577              |
| IBRNet <sub>ft-1.0h</sub> [14]  | 23.92           | 0.816           | 0.229              | 20.51           | 0.810           | 0.212              |
| MVSNeRF <sub>ft-15min</sub> [3] | 21.34           | 0.831           | 0.253              | 22.32           | 0.850           | 0.217              |
| ENeRF <sub>ft-1.0h</sub> [8]    | 24.35           | 0.884           | <u>0.148</u>       | <u>24.01</u>    | <u>0.885</u>    | <u>0.141</u>       |
| 3D-GS <sub>ft-2min30s</sub> [5] | 21.07           | 0.825           | 0.255              | 19.19           | 0.731           | 0.384              |
| 3D-GS <sub>ft-15min</sub> [5]   | <b>24.89</b>    | <u>0.897</u>    | 0.152              | 22.42           | 0.838           | 0.215              |
| Ours <sub>ft-90s</sub>          | <u>24.73</u>    | <b>0.910</b>    | <b>0.133</b>       | <b>24.43</b>    | <b>0.896</b>    | <b>0.140</b>       |

**Table 10: Quantitative per-scene breakdown results on the Real Forward-facing dataset.** PixelSplat\* and Ours\* represent the results obtained with a 2-view input and low-resolution images, while the other generalizable results are obtained with a 3-view input.

| Scene                           | Fern               | Flower       | Fortress     | Horns        | Leaves       | Orchids      | Room         | Trex         |
|---------------------------------|--------------------|--------------|--------------|--------------|--------------|--------------|--------------|--------------|
| Metric                          | PSNR $\uparrow$    |              |              |              |              |              |              |              |
| PixelNeRF [18]                  | 12.40              | 10.00        | 14.07        | 11.07        | 9.85         | 9.62         | 11.75        | 10.55        |
| IBRNet [14]                     | 20.83              | 22.38        | 27.67        | 22.06        | 18.75        | 15.29        | 27.26        | 20.06        |
| MVSNeRF [3]                     | 21.15              | <u>24.74</u> | 26.03        | 23.57        | 17.51        | 17.85        | 26.95        | <b>23.20</b> |
| ENeRF [8]                       | <u>21.92</u>       | 24.28        | <u>30.43</u> | <u>24.49</u> | <u>19.01</u> | <u>17.94</u> | <u>29.75</u> | 21.21        |
| MatchNeRF [4]                   | 20.98              | 23.97        | 27.44        | 23.14        | 18.62        | <b>18.07</b> | 26.77        | 20.47        |
| Ours                            | <b>22.45</b>       | <b>25.66</b> | <b>30.46</b> | <b>24.70</b> | <b>19.81</b> | 17.86        | <b>29.86</b> | <u>21.75</u> |
| PixelSplat* [2]                 | 22.41              | 24.48        | 27.00        | 25.02        | 19.80        | 18.39        | 27.56        | 19.28        |
| Ours*                           | 22.47              | 23.96        | 30.00        | 23.97        | 19.42        | 17.06        | 28.59        | 20.95        |
| NeRF <sub>ft-10.2h</sub> [11]   | 23.87              | 26.84        | <b>31.37</b> | 25.96        | 21.21        | 19.81        | <b>33.54</b> | <b>25.19</b> |
| IBRNet <sub>ft-1.0h</sub> [14]  | 22.64              | 26.55        | 30.34        | 25.01        | <u>22.07</u> | 19.01        | 31.05        | 22.34        |
| MVSNeRF <sub>ft-15min</sub> [3] | 23.10              | 27.23        | 30.43        | <u>26.35</u> | 21.54        | 20.51        | 30.12        | 24.32        |
| ENeRF <sub>ft-1.0h</sub> [8]    | 22.08              | <b>27.74</b> | 29.58        | 25.50        | 21.26        | 19.50        | 30.07        | 23.39        |
| 3D-GS <sub>ft-2min</sub> [5]    | <b>24.62</b>       | 23.23        | 28.94        | 20.49        | 15.81        | <b>22.76</b> | 22.17        | 19.19        |
| 3D-GS <sub>ft-10min</sub> [5]   | <u>24.58</u>       | 24.90        | 29.27        | 21.90        | 15.77        | <u>22.42</u> | 31.45        | 21.09        |
| Ours <sub>ft-45s</sub>          | 24.32              | <u>27.66</u> | <u>31.05</u> | <b>30.30</b> | <b>22.53</b> | 22.38        | <u>33.11</u> | <u>24.51</u> |
| Metric                          | SSIM $\uparrow$    |              |              |              |              |              |              |              |
| PixelNeRF [18]                  | 0.531              | 0.433        | 0.674        | 0.516        | 0.268        | 0.317        | 0.691        | 0.458        |
| IBRNet [14]                     | 0.710              | 0.854        | <u>0.894</u> | 0.840        | 0.705        | 0.571        | 0.950        | 0.768        |
| MVSNeRF [3]                     | 0.638              | 0.888        | 0.872        | 0.868        | 0.667        | 0.657        | 0.951        | <b>0.868</b> |
| ENeRF [8]                       | <u>0.774</u>       | <u>0.893</u> | <b>0.948</b> | <u>0.905</u> | <u>0.744</u> | <u>0.681</u> | <u>0.971</u> | 0.826        |
| MatchNeRF [4]                   | 0.726              | 0.861        | 0.906        | 0.870        | 0.690        | 0.675        | 0.949        | 0.767        |
| Ours                            | <b>0.792</b>       | <b>0.908</b> | <b>0.948</b> | <b>0.913</b> | <b>0.784</b> | <b>0.701</b> | <b>0.973</b> | <u>0.841</u> |
| PixelSplat* [2]                 | 0.754              | 0.868        | 0.891        | 0.884        | 0.747        | 0.673        | 0.952        | 0.712        |
| Ours*                           | 0.787              | 0.877        | 0.937        | 0.896        | 0.772        | 0.649        | 0.962        | 0.798        |
| NeRF <sub>ft-10.2h</sub> [11]   | 0.828              | 0.897        | <u>0.945</u> | 0.900        | 0.792        | 0.721        | <u>0.978</u> | <u>0.899</u> |
| IBRNet <sub>ft-1.0h</sub> [14]  | 0.774              | 0.909        | 0.937        | 0.904        | <u>0.843</u> | 0.705        | 0.972        | 0.842        |
| MVSNeRF <sub>ft-15min</sub> [3] | 0.795              | 0.912        | 0.943        | <u>0.917</u> | 0.826        | 0.732        | 0.966        | 0.895        |
| ENeRF <sub>ft-1.0h</sub> [8]    | 0.770              | <u>0.923</u> | 0.940        | 0.904        | 0.827        | 0.725        | 0.965        | 0.869        |
| 3D-GS <sub>ft-2min</sub> [5]    | <b>0.845</b>       | 0.850        | 0.918        | 0.813        | 0.495        | <b>0.850</b> | 0.930        | 0.759        |
| 3D-GS <sub>ft-10min</sub> [5]   | 0.841              | 0.870        | 0.934        | 0.820        | 0.490        | 0.843        | 0.975        | 0.807        |
| Ours <sub>ft-45s</sub>          | <u>0.835</u>       | <b>0.937</b> | <b>0.963</b> | <b>0.962</b> | <b>0.871</b> | <u>0.844</u> | <b>0.986</b> | <b>0.911</b> |
| Metric                          | LPIPS $\downarrow$ |              |              |              |              |              |              |              |
| PixelNeRF [18]                  | 0.650              | 0.708        | 0.608        | 0.705        | 0.695        | 0.721        | 0.611        | 0.667        |
| IBRNet [14]                     | 0.349              | 0.224        | 0.196        | 0.285        | 0.292        | 0.413        | 0.161        | 0.314        |
| MVSNeRF [3]                     | 0.238              | 0.196        | 0.208        | 0.237        | 0.313        | <b>0.274</b> | 0.172        | <u>0.184</u> |
| ENeRF [8]                       | <u>0.224</u>       | <u>0.164</u> | <b>0.092</b> | <u>0.161</u> | <u>0.216</u> | 0.289        | <u>0.120</u> | 0.192        |
| MatchNeRF [4]                   | 0.285              | 0.202        | 0.169        | 0.234        | 0.277        | 0.325        | 0.167        | 0.294        |
| Ours                            | <b>0.193</b>       | <b>0.133</b> | <u>0.096</u> | <b>0.148</b> | <b>0.189</b> | <u>0.275</u> | <b>0.104</b> | <b>0.177</b> |
| PixelSplat* [2]                 | 0.181              | 0.158        | 0.149        | 0.160        | 0.214        | 0.275        | 0.128        | 0.258        |
| Ours*                           | 0.173              | 0.124        | 0.082        | 0.142        | 0.182        | 0.261        | 0.083        | 0.167        |
| NeRF <sub>ft-10.2h</sub> [11]   | 0.291              | 0.176        | 0.147        | 0.247        | 0.301        | 0.321        | 0.157        | 0.245        |
| IBRNet <sub>ft-1.0h</sub> [14]  | 0.266              | 0.146        | 0.133        | 0.190        | 0.180        | 0.286        | <u>0.089</u> | 0.222        |
| MVSNeRF <sub>ft-15min</sub> [3] | 0.253              | 0.143        | 0.134        | 0.188        | 0.222        | 0.258        | 0.149        | 0.187        |
| ENeRF <sub>ft-1.0h</sub> [8]    | 0.197              | <u>0.121</u> | <u>0.101</u> | <u>0.155</u> | <u>0.168</u> | 0.247        | 0.113        | <u>0.169</u> |
| 3D-GS <sub>ft-2min</sub> [5]    | <u>0.154</u>       | 0.204        | 0.146        | 0.338        | 0.425        | <b>0.142</b> | 0.222        | 0.309        |
| 3D-GS <sub>ft-10min</sub> [5]   | <b>0.147</b>       | 0.183        | 0.121        | 0.289        | 0.421        | <u>0.145</u> | 0.123        | 0.276        |
| Ours <sub>ft-45s</sub>          | 0.161              | <b>0.097</b> | <b>0.077</b> | <b>0.091</b> | <b>0.143</b> | <u>0.145</u> | <b>0.079</b> | <b>0.113</b> |

**Table 11: Quantitative per-scene breakdown results on the NeRF Synthetic dataset.** PixelSplat\* and Ours\* represent the results obtained with a 2-view and low-resolution input, while the other generalizable results are obtained with a 3-view input.

| Scene                           | Chair              | Drums        | Ficus        | Hotdog       | Lego         | Materials    | Mic          | Ship         |
|---------------------------------|--------------------|--------------|--------------|--------------|--------------|--------------|--------------|--------------|
| Metric                          | PSNR $\uparrow$    |              |              |              |              |              |              |              |
| PixelNeRF [18]                  | 7.18               | 8.15         | 6.61         | 6.80         | 7.74         | 7.61         | 7.71         | 7.30         |
| IBRNet [14]                     | 24.20              | 18.63        | 21.59        | 27.70        | 22.01        | 20.91        | 22.10        | 22.36        |
| MVSNeRF [3]                     | 23.35              | 20.71        | 21.98        | 28.44        | 23.18        | 20.05        | 22.62        | 23.35        |
| ENeRF [8]                       | <u>28.29</u>       | <u>21.71</u> | <b>23.83</b> | <u>34.20</u> | <b>24.97</b> | <u>24.01</u> | <u>26.62</u> | <u>25.73</u> |
| MatchNeRF [4]                   | 25.23              | 19.97        | 22.72        | 24.19        | <u>23.77</u> | 23.12        | 24.46        | 22.11        |
| Ours                            | <b>28.93</b>       | <b>22.20</b> | <u>23.55</u> | <b>35.01</b> | <b>24.97</b> | <b>24.49</b> | <b>26.80</b> | <b>25.75</b> |
| PixelSplat* [2]                 | 16.45              | 15.40        | 17.47        | 13.25        | 16.86        | 15.88        | 16.83        | 14.06        |
| Ours*                           | 27.95              | 21.20        | 23.22        | 33.79        | 24.23        | 24.55        | 24.22        | 23.54        |
| NeRF [11]                       | 31.07              | 25.46        | 29.73        | 34.63        | 32.66        | <b>30.22</b> | 31.81        | 29.49        |
| IBRNet <sub>ft-1.0h</sub> [14]  | 28.18              | 21.93        | 25.01        | 31.48        | 25.34        | 24.27        | 27.29        | 21.48        |
| MVSNeRF <sub>ft-15min</sub> [3] | 26.80              | 22.48        | 26.24        | 32.65        | 26.62        | 25.28        | 29.78        | 26.73        |
| ENeRF <sub>ft-1.0h</sub> [8]    | 28.94              | 25.33        | 24.71        | <u>35.63</u> | 25.39        | 24.98        | 29.25        | 26.36        |
| 3D-GS <sub>ft-1min15s</sub> [5] | <u>31.90</u>       | <b>26.56</b> | <b>34.21</b> | 34.21        | <b>36.28</b> | 29.80        | <b>34.56</b> | <u>29.70</u> |
| 3D-GS <sub>ft-7min</sub> [5]    | 31.20              | <u>26.26</u> | <u>33.93</u> | 34.30        | <u>36.10</u> | 29.53        | <u>34.39</u> | 28.90        |
| Ours <sub>ft-50s</sub>          | <b>32.80</b>       | 25.91        | 31.54        | <b>36.85</b> | 35.68        | <u>29.83</u> | 33.92        | <b>31.09</b> |
| Metric                          | SSIM $\uparrow$    |              |              |              |              |              |              |              |
| PixelNeRF [18]                  | 0.624              | 0.670        | 0.669        | 0.669        | 0.671        | 0.644        | 0.729        | 0.584        |
| IBRNet [14]                     | 0.888              | 0.836        | 0.881        | 0.923        | 0.874        | 0.872        | 0.927        | 0.794        |
| MVSNeRF [3]                     | 0.876              | 0.886        | 0.898        | 0.962        | 0.902        | 0.893        | 0.923        | 0.886        |
| ENeRF [8]                       | <u>0.965</u>       | <u>0.918</u> | <u>0.932</u> | <u>0.981</u> | <u>0.948</u> | <u>0.937</u> | <u>0.969</u> | <u>0.891</u> |
| MatchNeRF [4]                   | 0.908              | 0.868        | 0.897        | 0.943        | 0.903        | 0.908        | 0.947        | 0.806        |
| Ours                            | <b>0.969</b>       | <b>0.927</b> | <b>0.935</b> | <b>0.984</b> | <b>0.953</b> | <b>0.946</b> | <b>0.974</b> | <b>0.895</b> |
| PixelSplat* [2]                 | 0.816              | 0.787        | 0.857        | 0.644        | 0.799        | 0.764        | 0.861        | 0.508        |
| Ours*                           | 0.962              | 0.909        | 0.920        | 0.978        | 0.940        | 0.940        | 0.957        | 0.873        |
| NeRF [11]                       | 0.971              | 0.943        | 0.969        | 0.980        | 0.975        | <u>0.968</u> | 0.981        | 0.908        |
| IBRNet <sub>ft-1.0h</sub> [14]  | 0.955              | 0.913        | 0.940        | 0.978        | 0.940        | 0.937        | 0.974        | 0.877        |
| MVSNeRF <sub>ft-15min</sub> [3] | 0.934              | 0.898        | 0.944        | 0.971        | 0.924        | 0.927        | 0.970        | 0.879        |
| ENeRF <sub>ft-1.0h</sub> [8]    | 0.971              | <b>0.960</b> | 0.939        | <u>0.985</u> | 0.949        | 0.947        | 0.985        | 0.893        |
| 3D-GS <sub>ft-1min15s</sub> [5] | <u>0.981</u>       | <u>0.956</u> | <b>0.986</b> | 0.983        | <u>0.987</u> | <b>0.970</b> | <u>0.991</u> | <u>0.918</u> |
| 3D-GS <sub>ft-7min</sub> [5]    | 0.977              | 0.951        | <u>0.985</u> | 0.981        | <u>0.987</u> | <u>0.968</u> | <b>0.992</b> | 0.909        |
| Ours <sub>ft-50s</sub>          | <b>0.983</b>       | 0.952        | 0.981        | <b>0.987</b> | <b>0.988</b> | <b>0.970</b> | <b>0.992</b> | <b>0.921</b> |
| Metric                          | LPIPS $\downarrow$ |              |              |              |              |              |              |              |
| PixelNeRF [18]                  | 0.386              | 0.421        | 0.335        | 0.433        | 0.427        | 0.432        | 0.329        | 0.526        |
| IBRNet [14]                     | 0.144              | 0.241        | 0.159        | 0.175        | 0.202        | 0.164        | 0.103        | 0.369        |
| MVSNeRF [3]                     | 0.282              | 0.187        | 0.211        | 0.173        | 0.204        | 0.216        | 0.177        | 0.244        |
| ENeRF [8]                       | <u>0.055</u>       | <u>0.110</u> | <u>0.076</u> | <u>0.059</u> | <u>0.075</u> | <u>0.084</u> | <u>0.039</u> | <u>0.183</u> |
| MatchNeRF [4]                   | 0.107              | 0.185        | 0.117        | 0.162        | 0.160        | 0.119        | 0.060        | 0.398        |
| Ours                            | <b>0.036</b>       | <b>0.091</b> | <b>0.069</b> | <b>0.040</b> | <b>0.066</b> | <b>0.063</b> | <b>0.027</b> | <b>0.179</b> |
| PixelSplat* [2]                 | 0.260              | 0.287        | 0.282        | 0.365        | 0.273        | 0.309        | 0.241        | 0.493        |
| Ours*                           | 0.039              | 0.098        | 0.066        | 0.038        | 0.071        | 0.050        | 0.038        | 0.170        |
| NeRF [11]                       | 0.055              | 0.101        | 0.047        | 0.089        | <u>0.054</u> | 0.105        | 0.033        | 0.263        |
| IBRNet <sub>ft-1.0h</sub> [14]  | 0.079              | 0.133        | 0.082        | 0.093        | 0.105        | 0.093        | 0.040        | 0.257        |
| MVSNeRF <sub>ft-15min</sub> [3] | 0.129              | 0.197        | 0.171        | 0.094        | 0.176        | 0.167        | 0.117        | 0.294        |
| ENeRF <sub>ft-1.0h</sub> [8]    | 0.030              | <b>0.045</b> | 0.071        | <b>0.028</b> | 0.070        | 0.059        | 0.017        | 0.183        |
| 3D-GS <sub>ft-1min15s</sub> [5] | <u>0.022</u>       | <u>0.059</u> | <b>0.016</b> | 0.042        | <b>0.021</b> | <u>0.041</u> | <u>0.010</u> | 0.180        |
| 3D-GS <sub>ft-7min</sub> [5]    | 0.026              | 0.062        | <u>0.018</u> | 0.044        | <b>0.021</b> | 0.043        | <b>0.009</b> | <u>0.172</u> |
| Ours <sub>ft-50s</sub>          | <b>0.021</b>       | <u>0.059</u> | 0.022        | <u>0.032</u> | <b>0.021</b> | <b>0.038</b> | <u>0.010</u> | <b>0.138</b> |

## References

1. Aanaes, H., Jensen, R.R., Vogiatzis, G., Tola, E., Dahl, A.B.: Large-scale data for multiple-view stereopsis. *IJCV* **120**, 153–168 (2016)
2. Charatan, D., Li, S., Tagliasacchi, A., Sitzmann, V.: pixelsplat: 3d gaussian splats from image pairs for scalable generalizable 3d reconstruction. In: arXiv (2023)
3. Chen, A., Xu, Z., Zhao, F., Zhang, X., Xiang, F., Yu, J., Su, H.: Mvsnerf: Fast generalizable radiance field reconstruction from multi-view stereo. In: *ICCV*. pp. 14124–14133 (2021)
4. Chen, Y., Xu, H., Wu, Q., Zheng, C., Cham, T.J., Cai, J.: Explicit correspondence matching for generalizable neural radiance fields. arXiv preprint arXiv:2304.12294 (2023)
5. Kerbl, B., Kopanas, G., Leimkühler, T., Drettakis, G.: 3d gaussian splatting for real-time radiance field rendering. *ACM Transactions on Graphics* **42**(4) (2023)
6. Kingma, D.P., Ba, J.: Adam: A method for stochastic optimization. arXiv preprint arXiv:1412.6980 (2014)
7. Knapitsch, A., Park, J., Zhou, Q.Y., Koltun, V.: Tanks and temples benchmarking large-scale scene reconstruction. *ACM Trans. Graph.* **36**(4), 1–13 (2017)
8. Lin, H., Peng, S., Xu, Z., Yan, Y., Shuai, Q., Bao, H., Zhou, X.: Efficient neural radiance fields for interactive free-viewpoint video. In: *SIGGRAPH Asia Conference Proceedings* (2022)
9. Liu, T., Ye, X., Zhao, W., Pan, Z., Shi, M., Cao, Z.: When epipolar constraint meets non-local operators in multi-view stereo. In: *ICCV*. pp. 18088–18097 (2023)
10. Mildenhall, B., Srinivasan, P.P., Ortiz-Cayon, R., Kalantari, N.K., Ramamoorthi, R., Ng, R., Kar, A.: Local light field fusion: Practical view synthesis with prescriptive sampling guidelines. *ACM Trans. Graph.* **38**(4), 1–14 (2019)
11. Mildenhall, B., Srinivasan, P.P., Tancik, M., Barron, J.T., Ramamoorthi, R., Ng, R.: Nerf: Representing scenes as neural radiance fields for view synthesis. In: *ECCV* (2020)
12. Schonberger, J.L., Frahm, J.M.: Structure-from-motion revisited. In: *CVPR*. pp. 4104–4113 (2016)
13. Szymanowicz, S., Rupprecht, C., Vedaldi, A.: Splatter image: Ultra-fast single-view 3d reconstruction. In: arXiv (2023)
14. Wang, Q., Wang, Z., Genova, K., Srinivasan, P., Zhou, H., Barron, J.T., Martin-Brualla, R., Snavely, N., Funkhouser, T.: Ibrnet: Learning multi-view image-based rendering. In: *CVPR* (2021)
15. Yan, J., Wei, Z., Yi, H., Ding, M., Zhang, R., Chen, Y., Wang, G., Tai, Y.W.: Dense hybrid recurrent multi-view stereo net with dynamic consistency checking. In: *ECCV*. pp. 674–689. Springer (2020)
16. Yao, Y., Luo, Z., Li, S., Fang, T., Quan, L.: Mvsnet depth inference for unstructured multi-view stereo. In: *ECCV*. pp. 767–783 (2018)
17. Yao, Y., Luo, Z., Li, S., Zhang, J., Ren, Y., Zhou, L., Fang, T., Quan, L.: Blendmvs a large-scale dataset for generalized multi-view stereo networks. In: *CVPR*. pp. 1790–1799 (2020)
18. Yu, A., Ye, V., Tancik, M., Kanazawa, A.: pixelNeRF: Neural radiance fields from one or few images. In: *CVPR* (2021)
19. Zheng, S., Zhou, B., Shao, R., Liu, B., Zhang, S., Nie, L., Liu, Y.: Gps-gaussian: Generalizable pixel-wise 3d gaussian splatting for real-time human novel view synthesis. arXiv (2023)
20. Zhu, Z., Fan, Z., Jiang, Y., Wang, Z.: Fsgs: Real-time few-shot view synthesis using gaussian splatting (2023)
